# Supplementary material
Source: PubMed Central journal article supplement (PMC4040224)

## Supplemental figure legends

### Fig. S1. Related to Figure 1

- A. Survival curve of mice infected with a range of viral titers ( $10^5$  - $10^3$  pfu) and the mock infection.
- B. Survival curve of mice infected with a range of viral titers (500 -125 pfu)
- C. Body weight over time of mice infected with 125, 250 and 500 pfu of virus. Error bars, SD of mean.
- D. Control panel shows normal distribution of Clara cells (anti-CC10, red) in bronchioles, AT2 cells (SPC, red) in lung parenchyma, and ciliated cells (acetylated alpha tubulin, green; TAp73, red) in trachea (top panel). At 7dpi Clara cells, AT2 cells, and ciliated cells are disorganized and largely depleted (bottom panel). Scale bar, 50 $\mu$ m.
- E. Immunofluorescence detection of viral M2 (red) protein in cells expressing CC10 (green) and SPC (green) at 7dpi. Scale bar, 20 $\mu$ m.
- F. Detection of common leukocyte antigen CD45 (green) in normal lung (0dpi), 11dpi lung, and 21dpi lung. Scale bar, 100 $\mu$ m.
- G. Masson trichrome staining in murine lung at 15dpi. Keratin and muscle fibers stain red, collagen and bone stain blue, cytoplasm stains light red or pink and nuclei stain brown or black. Scale bar, 100 $\mu$ m.

### Fig. S2. Related to Figure 1

- A. Immunofluorescence on sections of bronchiolar epithelium at progressive times of infection showing distribution of Clara cells (CC10, green) and basal cells (p63, red). Scale bar, 20mm.
- B. Distribution of p63+ cells in the bronchioles and lung parenchyma before and 11 days after infection. Error bars, SD of mean.
- C. Western blot of whole lung with antibodies to p63 at different times of H1N1 influenza infection. Lower panel graph depicts p63 expression normalized with respect to actin expression.
- D. Left, Immunofluorescence image of BrdU (green) incorporation in the bronchioles at 11dpi and quantification of BrdU-positive Krt5+ (red) cells

- versus total Krt5+ cells over time. Right, Immunofluorescence image of BrdU (green) incorporation in lung parenchyma at 15dpi and quantification of BrdU-positive Krt5+ cells versus total Krt5+(red) cells over time. Scale bar, 20 $\mu$ m. Error bars, SD of mean.
- E. Krt5 pods are not seen in normal lung parenchyma nor in lung damaged by bleomycin. Left panel, control and bleomycin treated lungs stained with antibodies to Pdpn (green) and SPC (red). Right panel, control and bleomycin treated lungs stained with antibodies to Krt5 (green) and p63 (red). Scale bar, 50 $\mu$ m.

Fig. S3. Related to Figure 3.

- A. Left panel, immunofluorescence comparison of anti-CC10 staining (green) in DASC and TASC-ALI cultures. Right panel, histogram reflecting direct counting of CC10-positive cells in DASC and TASC ALI cultures.
- B. Upper panel, immunofluorescence labeling of p63-positive cells (red) in 10 day TASC Matrigel cultures. Lower panel, absence of anti-activated caspase 3 staining in squamous metaplasia structures formed in Matrigel by TASCs. DNA is counterstained with DAPI (blue).
- C. Upper panel, absence of p63 staining in 10 day DASC Matrigel cultures. Lower panel, immunofluorescence detection of anti-activated caspase 3 antibodies (green) in DASC Matrigel culture at day 7. DNA is counterstained DAPI (blue).

Fig. S4. Related to Figure 4.

44 gene provisional signature of TASCs versus DASCs derived from three whole genome microarray analyses of each. P values and fold-changes are presented and those genes validated by qPCR are shown in red.

Fig. S5. Related to Figure 5

Expression heatmaps of microarray data of three control and infected lung colonies covering related GO categories of Wound Healing (top), Tissue Development (middle), and Regulation of Growth (bottom).

Fig. S6. Related to Figure 6

- A. Immunofluorescence imaging of 11B6 (red) and CC10 (green) in normal lung. Scale bar, 50 $\mu$ m.
- B. Immunofluorescence imaging of PDPN (red) and CC10 (green) in normal lung.
- C. Low power view of 21dpi lung after IHC staining of Krt5. Scale bar, 200 $\mu$ m.
- D. Merged and isolated images of anti-Krt5 (red) and anti-CD45 (green) staining in lung parenchyma at 15dpi.
- E. Merged and isolated images of anti-Krt5 (red) and anti-smooth muscle actin (SMA, green) staining in 15dpi lung.
- F. Merged of isolated images of anti-Krt5 (red) and anti-pan-keratin (green) in lung parenchyma of 15dpi lung. Scale bar, 50 $\mu$ m.

Fig. S7. Related to Figure 7

- A. Staining of histologically normal appearing 25dpi lung with antibodies to SPC (red) and 11B6 (green).
- B. Staining of Krt5+ regions of 25dpi lung stained with antibodies to Krt5 (red) and with 11B6 (green).
- C. Staining of Krt5-/SPC+ regions of 25dpi lung with antibodies to SPC (red) and with 11B6 (green).
- D. Staining of Krt5-/SPC- regions of 25dpi lung with antibodies to SPC (red) and with 11B6 (green). Scale bar, 20 $\mu$ m.

Fig. S8. Related to Figure 8

- A. Merged and isolated images of anti-Krt5 (red) and anti-Krt14 (green) staining in lung parenchyma at 13dpi.

- B. Histogram reflecting counting of Krt14-positive cells in bronchioles and deep lung at indicated dpi's.

Table S1. Related to Figure 3: Literature analysis of genes activated in DASC Matrigel cultures.

Table S2. Related to Figure 6: Gene Set Enrichment Analysis of Infected Lung

### **Supplemental Methods:**

#### **Cloning and Differentiating Human and Rat Airway Stem Cells**

##### **Airway stem cell culture**

Human nasal epithelial cells were isolated from human inferior turbinate. The biopsy specimens of inferior turbinate were obtained from patients who underwent surgery for nasal septal deviation under National University Health Services (Singapore) IRB approval. Normal human tracheobronchial epithelial cells and human small airway epithelial cells were purchase from Lonza. Primary rat lung epithelial cells were isolated from three-week-old Wistar rats. The airway cells were cultivated onto a feeder layer of lethally irradiated 3T3-J2 cells and clonal analysis was based on previously described methods for epidermal stem cells (Barrandon and Green, 1987).

##### **Expression Microarrays and Bioinformatics**

All samples were prepared according to manufacturer's instructions (WT-Ovation™ Pico RNA Amplification System WT-Ovation™ Exon Module, Encore™ Biotin Module, NuGEN technologies). Hybridization was performed with human exon 1.0 ST array chips (Affymetrix). All log<sub>2</sub>-transformed expression data was normalized, and a 1-way ANOVA was done to identify differentially expressed genes using Partek Genomics Suite 6.4. PCA was produced with

whole transcriptome, and heatmaps were generated with sorted datasets by Euclidean distance based on average linkage methods. Gene Set Enrichment Analysis (version 2.0) software was used to identify gene sets and pathways. (Subramanian et al., 2005)

### **Histology and Immunofluorescence**

Histology, immunohistochemistry, and immunofluorescence were performed using standard techniques, processed at the Histology Core at the Institute of Molecular and Cellular Biology at A-STAR and imaged at the Institute of Medical Biology, A-STAR.

Immunofluorescence staining was performed on 4% paraformaldehyde-fixed, paraffin-embedded sections or frozen sections. The sections were stained with antibodies to mucin 5AC (Santa Cruz Biotechnology), acetylated  $\alpha$ -tubulin (Sigma) and CC10 (US-Bio). p63 (clone 4A4), K5 (Neomarkers), K10 (Covance), Sp-C (Santa Cruz Biotechnology), podoplanin (PDPN) (Santa Cruz Biotechnology), involucrin (Abcam), and loricrin (Abcam). Alexa Fluor-coupled secondary antibodies (Invitrogen) were used for all immunofluorescence staining. All images for section slides were captured by using Alxo Observer.Z1 fluorescence microscope (Zeiss) with monochrome MR Rev3 and color ICc1 (Zeiss) cameras and Axiovision 4.8 software (Zeiss) or LSM 510 confocal microscope (Zeiss) with LSM software. Bright field cell culture images were obtained on an Eclipse TS100 microscope (Nikon) with Digital Sight DS-Fi1 camera (Nikon) and NIS-Elements F3.0 software (Nikon).

### **Monoclonal Antibodies to Rat Lung**

Six-week-old Balb/c mice were immunized with 1mg of homogenized rat lung by five intraperitoneal injections every three weeks and then B cells from the spleen were fused with NSO myeloma cells at a ratio of 4:1 (Kohler and Milstein, 1975). Hybridomas were obtained after 10-20 days on HAT selection, and antibodies from these hybridomas were screened directly on sections of adult rat lung using immunofluorescence detection. All positive clones were then cloned by limiting dilution and expanded for antibody production.

## **In vitro differentiation assays**

Air-liquid interface culture of nasal epithelial cells was performed as described (Schmidt et al., 1996). Briefly, cells were cultured on Transwell plates (Corning). At confluence, the medium on the inserts was removed and the medium outside the insert was changed to differentiation medium (DMEM/F12 1:1, 50µg/ml penicillin; 50µg/ml streptomycin; fungizone 2.5µg/ml (Gibco); 10ng/ml cholera toxin, retinoic acid  $10^{-7}$  M; 10% Knockout SR serum replacement (Gibco)). At day10, the membranes with cells were fixed for immunofluorescence staining or paraffin embedding.

Self-assembly sphere culture was performed as described (Ulrich et al., 1998). The cells were cultured in differentiation medium (DMEM/F12 1:1, 50µg/ml penicillin; 50µg/ml streptomycin; fungizone 2.5µg/ml (Gibco); 10ng/ml cholera toxin, retinoic acid  $10^{-7}$  M; 10% Knockout SR serum replacement (Gibco)). The culture dishes were placed on an orbital shaker in an incubator at 37° C and 5% CO<sub>2</sub>. On day 8, the self-assembly spheres were fixed for immunofluorescence staining.

3-D Matrigel assay was performed on chambered glass slides as describe in mammary cell 3-D culture (Xian et al., 2009). Briefly, the cell suspensions were placed on Matrigel at  $3 \times 10^4$  cells/chamber. After 20 days culturing in the differentiation medium CnT-23(Cellntec) + 1mM CaCl<sub>2</sub> with 1% Matrigel, the 3-D structures fixed for sectioning and staining.



Figure S1. Related to Figure 1

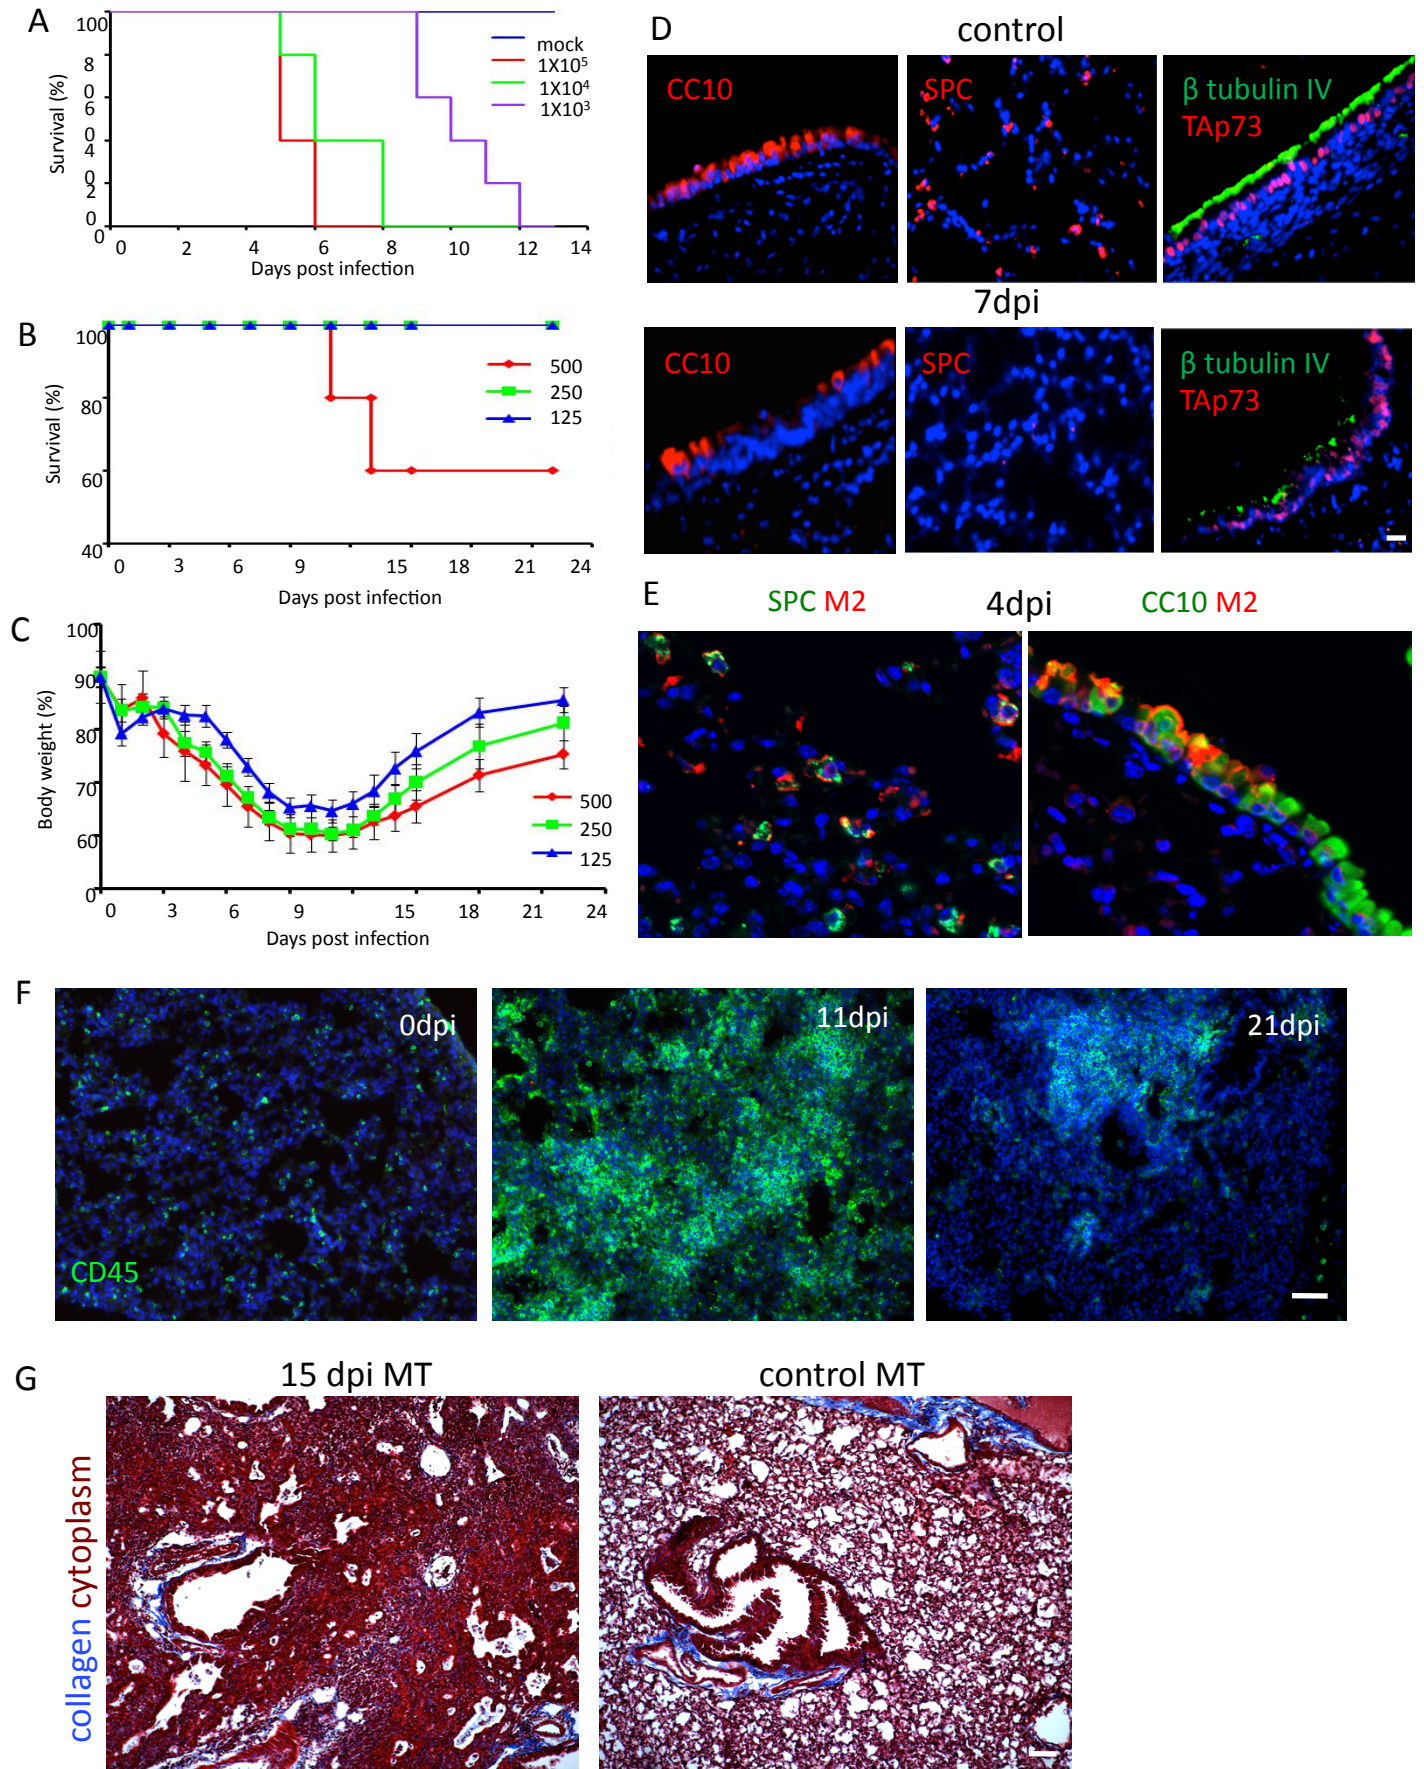



Figure S2. Related to Figure 1

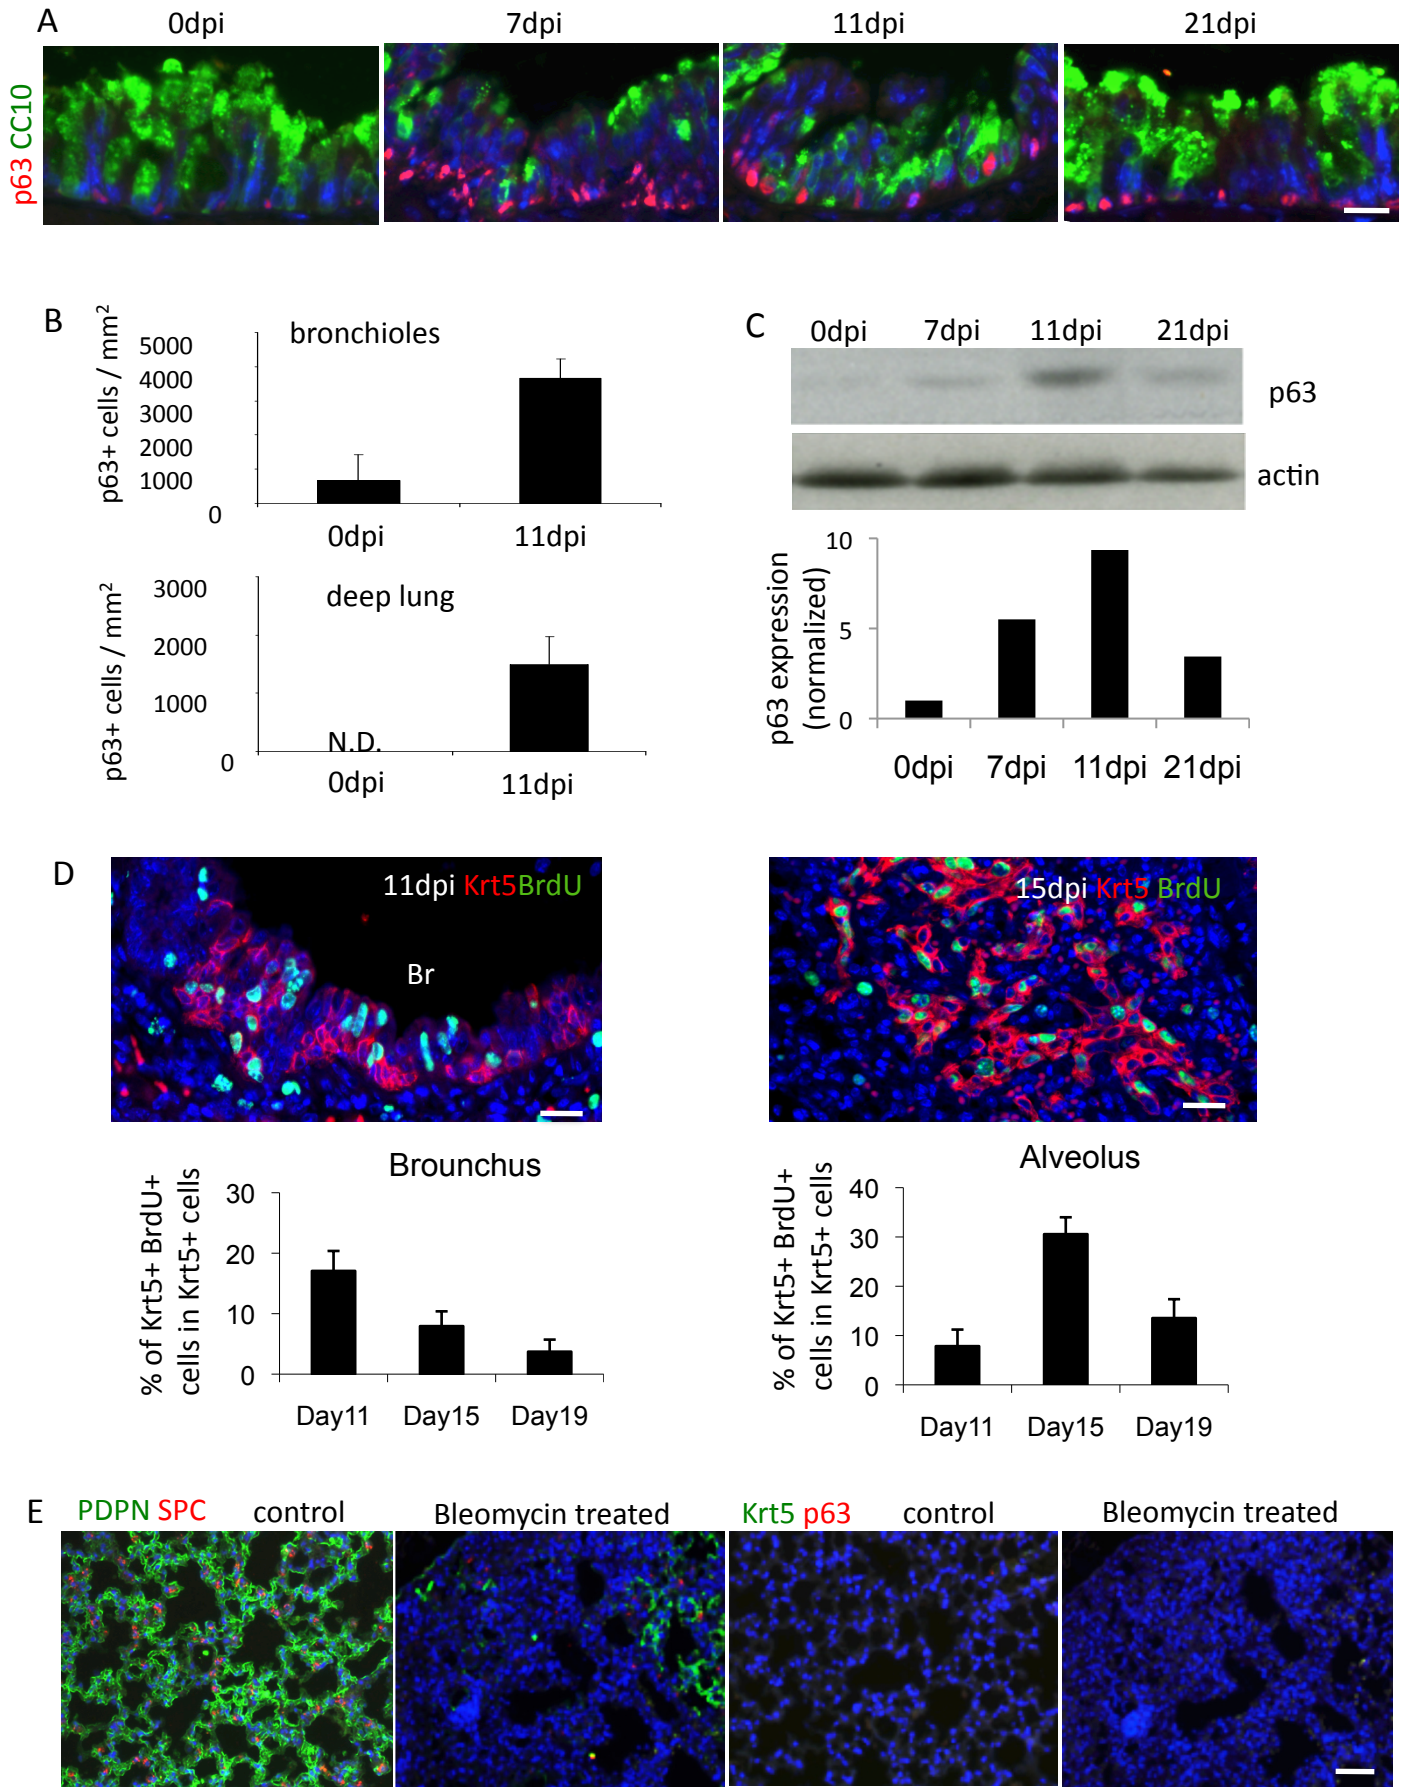

Figure S3. Related to Figure 3

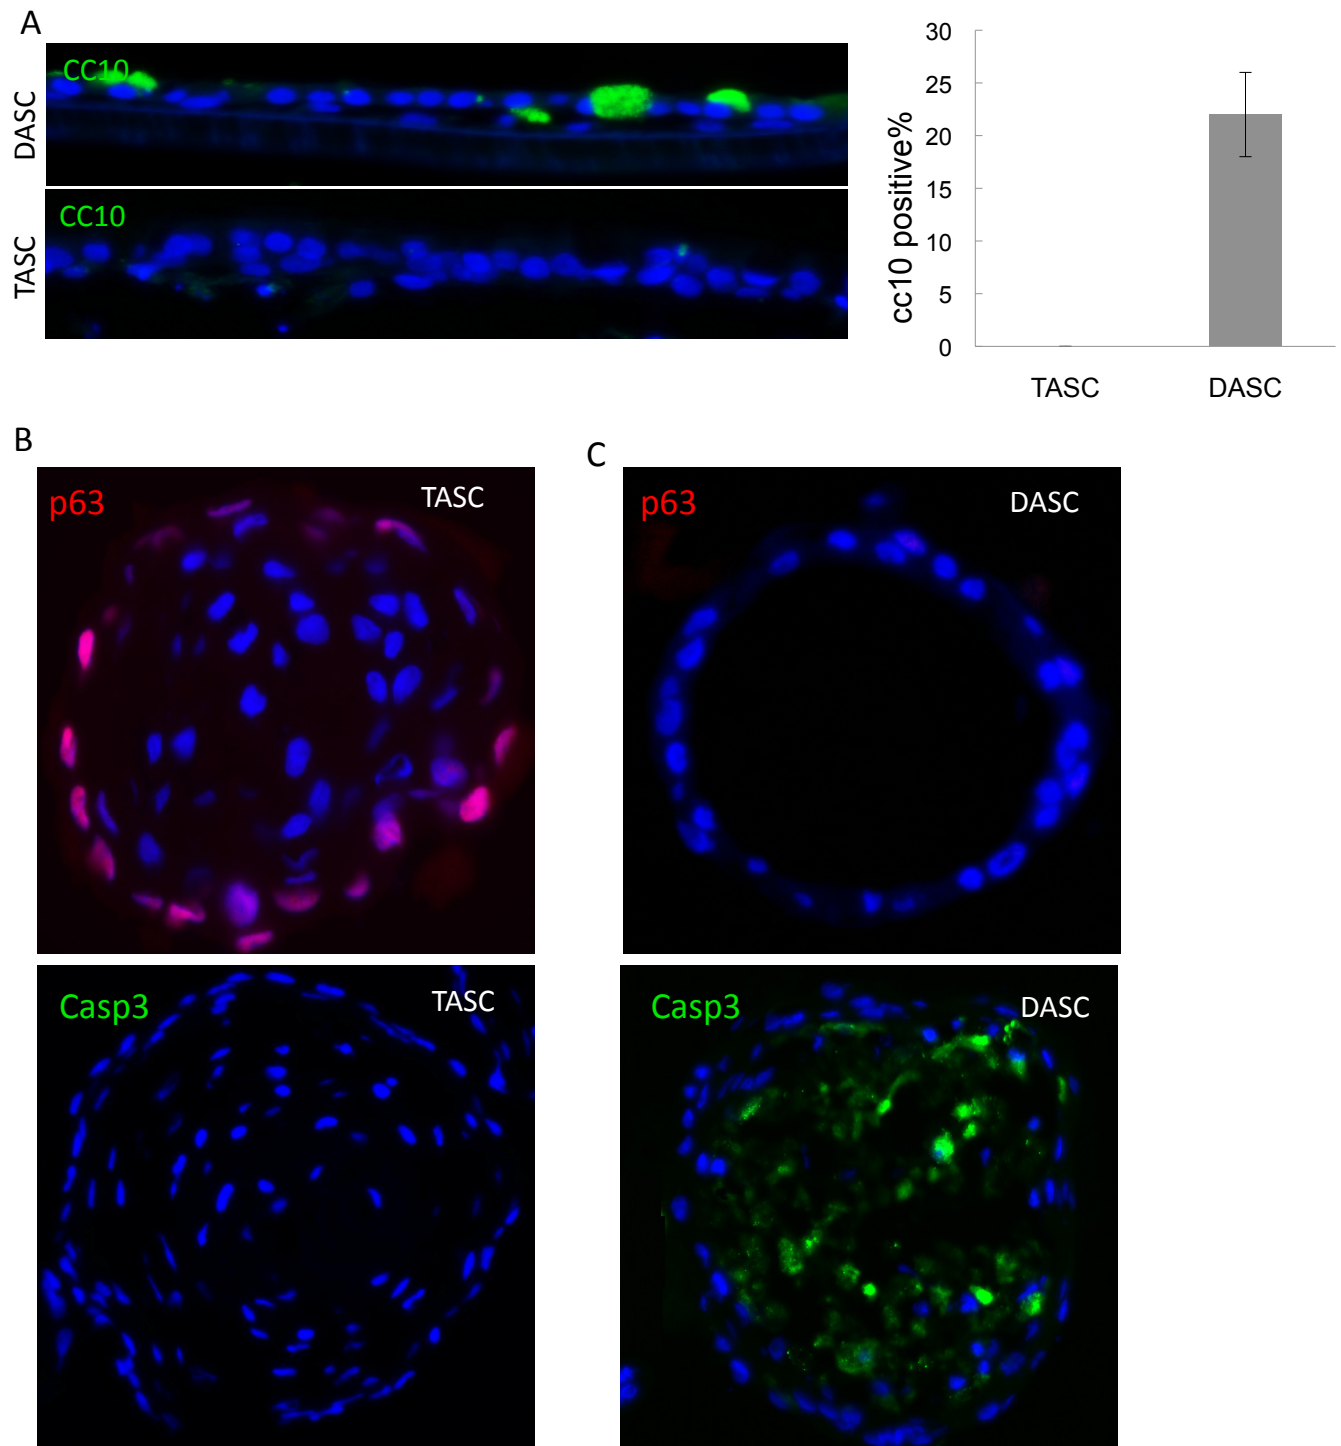

## Figure S4. Related to Figure 4

## TASC signature

| Gene Symbol | p-value     | Fold-Change(TASC vs. DASC) |
|-------------|-------------|----------------------------|
| *TMPRSS11D  | 7.03E-07    | 29.7703                    |
| SPRR1A      | 1.44E-06    | 24.4047                    |
| SPRR2C      | 6.17E-07    | 20.5046                    |
| *KRTDAP     | 5.78E-07    | 16.3986                    |
| *TMPRSS11B  | 3.87E-07    | 14.9493                    |
| CRNN        | 2.80E-05    | 13.0657                    |
| MT1L        | 0.000489486 | 12.6329                    |
| USP6        | 0.000121694 | 11.7649                    |
| RGS2        | 2.55E-06    | 10.9295                    |
| SPINK7      | 8.58E-05    | 10.7646                    |
| STARD4      | 1.42E-06    | 9.95315                    |
| RAET1L      | 0.000287793 | 9.88988                    |
| *TMPRSS11A  | 1.37E-05    | 9.73362                    |
| *DSG1       | 1.59E-08    | 9.00731                    |
| ZBED2       | 9.47E-05    | 7.9196                     |
| *ERAP2      | 7.17E-07    | 7.69252                    |
| HMGCS1      | 9.72E-06    | 7.63513                    |
| HLA-C       | 1.79E-05    | 7.6308                     |
| *POF1B      | 6.88E-07    | 7.57532                    |
| *GLIPR1     | 1.74E-06    | 7.47008                    |
| POPDC3      | 0.000584655 | 6.98849                    |
| *PRAC       | 0.000111292 | 6.84123                    |
| CCDC144A    | 0.000825603 | 6.78438                    |
| KLK6        | 3.49E-05    | 6.52463                    |
| LASS3       | 1.60E-06    | 6.21085                    |
| BCAT1       | 1.67E-06    | 6.07267                    |
| MMP10       | 1.03E-05    | 5.81306                    |
| GJB6        | 3.32E-07    | 5.77245                    |
| A2ML1       | 0.000667931 | 5.69143                    |
| DNAJC15     | 4.15E-06    | 5.59529                    |
| *IFI44      | 4.60E-07    | 5.17531                    |
| SLFN13      | 4.06E-06    | 5.08375                    |
| TMTC1       | 2.44E-05    | 4.9664                     |
| COL12A1     | 8.00E-08    | 4.93866                    |
| PTHLH       | 1.28E-05    | 4.9038                     |
| ECM1        | 8.40E-05    | 4.83907                    |
| SLFN11      | 1.26E-06    | 4.79127                    |
| KRT14       | 3.19E-07    | 4.79094                    |
| SCG5        | 1.73E-05    | 4.70702                    |
| TMPRSS11E   | 0.000821669 | 4.67233                    |
| *FBN2       | 2.72E-05    | 4.15269                    |
| *ECM1       | 8.40E-05    | 4.83907                    |
| *KRT13      | 0.00745423  | 4.07872                    |

## DASC signature

| Gene Symbol | p-value     | Fold-Change(DASC vs TASC) |
|-------------|-------------|---------------------------|
| GSTA2       | 6.70E-06    | 130.893                   |
| GSTA1       | 9.81E-07    | 42.6899                   |
| *LMO3       | 3.75E-08    | 40.8243                   |
| PPARGC1A    | 2.78E-08    | 21.4615                   |
| RPS15A      | 0.0244778   | 18.9258                   |
| ALDH1A1     | 5.59E-08    | 18.7274                   |
| *SCGB1A1    | 5.28E-05    | 18.1001                   |
| TF          | 2.63E-06    | 10.1834                   |
| GOLGA8A     | 8.42E-06    | 9.14632                   |
| ATP5L       | 0.0190024   | 8.39835                   |
| LSM3        | 0.00283319  | 7.84288                   |
| CP          | 0.000148531 | 7.56011                   |
| SLC34A2     | 0.000137024 | 7.47741                   |
| KRT15       | 9.61E-06    | 6.88251                   |
| RPL18       | 0.00405378  | 6.84999                   |
| RPL14       | 0.01627     | 6.69458                   |
| *SAA1       | 1.70E-06    | 6.0007                    |
| TMEM14C     | 0.00600444  | 5.80962                   |
| HINT1       | 0.00592648  | 5.64451                   |
| BNIP3       | 0.0122902   | 5.62118                   |
| COMMD6      | 0.0367675   | 5.51012                   |
| *SERPINF1   | 4.07E-07    | 5.20435                   |
| CYP4B1      | 8.70E-07    | 5.06866                   |
| LYPLA1      | 0.000328677 | 5.01599                   |
| TXNIP       | 1.81E-05    | 5.00165                   |
| RAP1B       | 0.0280893   | 4.98122                   |
| TRIM22      | 2.79E-06    | 4.88373                   |
| CHCHD3      | 0.0144078   | 4.7621                    |
| RPL17       | 0.0204879   | 4.69287                   |
| S100P       | 0.00456373  | 4.64782                   |
| CCDC146     | 4.50E-05    | 4.63141                   |
| SERPINB3    | 1.44E-05    | 4.53137                   |
| SH3PXD2A    | 0.0314038   | 4.35029                   |
| CIAPIN1     | 0.00286368  | 4.33304                   |
| CYP1B1      | 0.000900554 | 4.27465                   |
| SF3B5       | 0.000387497 | 4.19474                   |
| FAM46C      | 0.00065419  | 4.18709                   |
| STEAP4      | 0.00381719  | 4.15361                   |
| WFDC2       | 0.000125701 | 4.1281                    |
| *C4orf18    | 0.000166752 | 3.783                     |
| *SPRY1      | 0.000583069 | 3.60757                   |
| *DHRS3      | 8.46E-05    | 3.27823                   |
| *ADAM28     | 0.000389122 | 2.96755                   |
| *KLK7       | 0.00547097  | 2.90156                   |

\* qPCR verified

Figure S5. Related to Figure 5

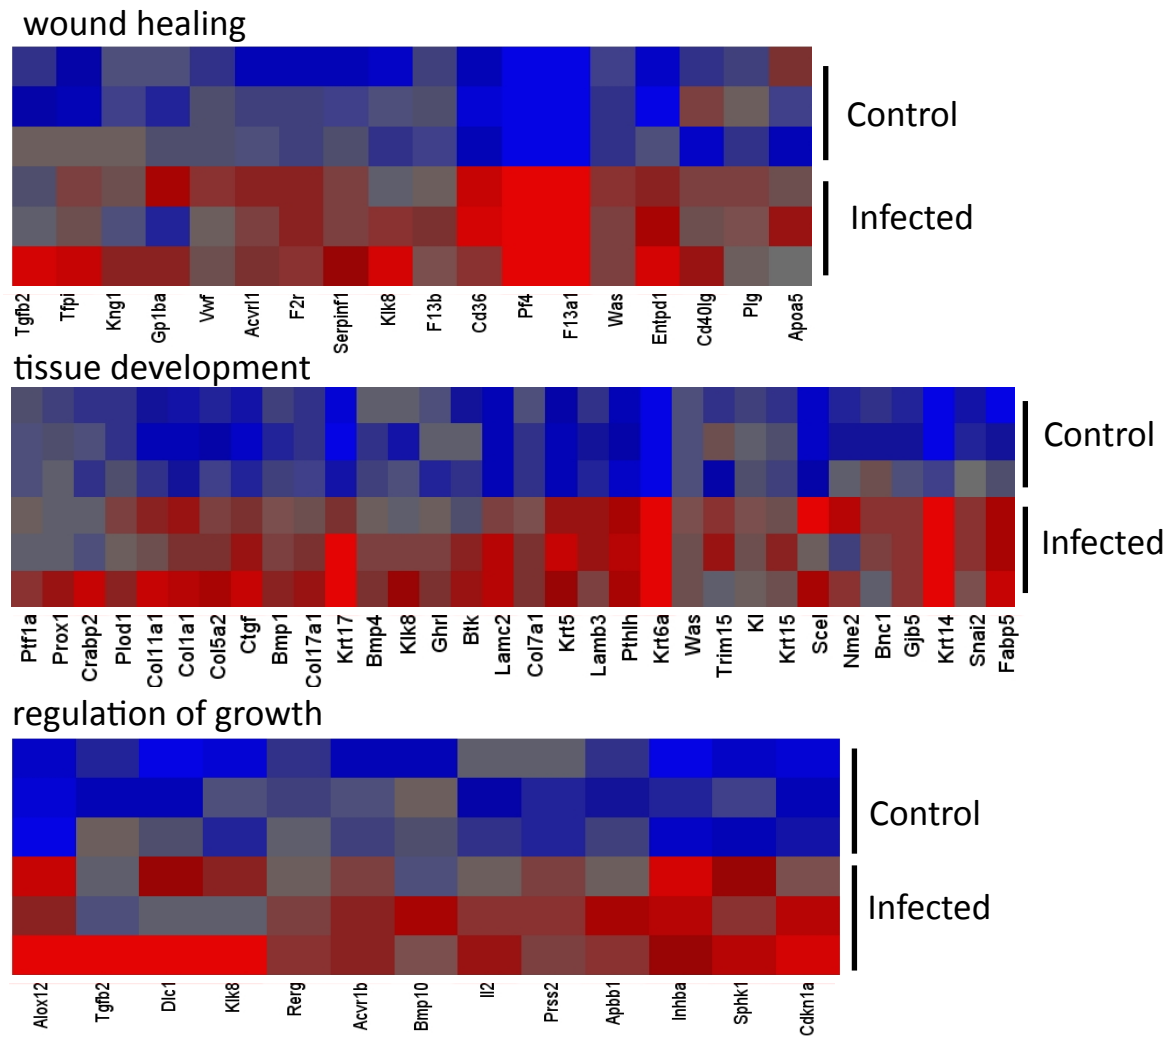

Figure S6. Related to Figure 6

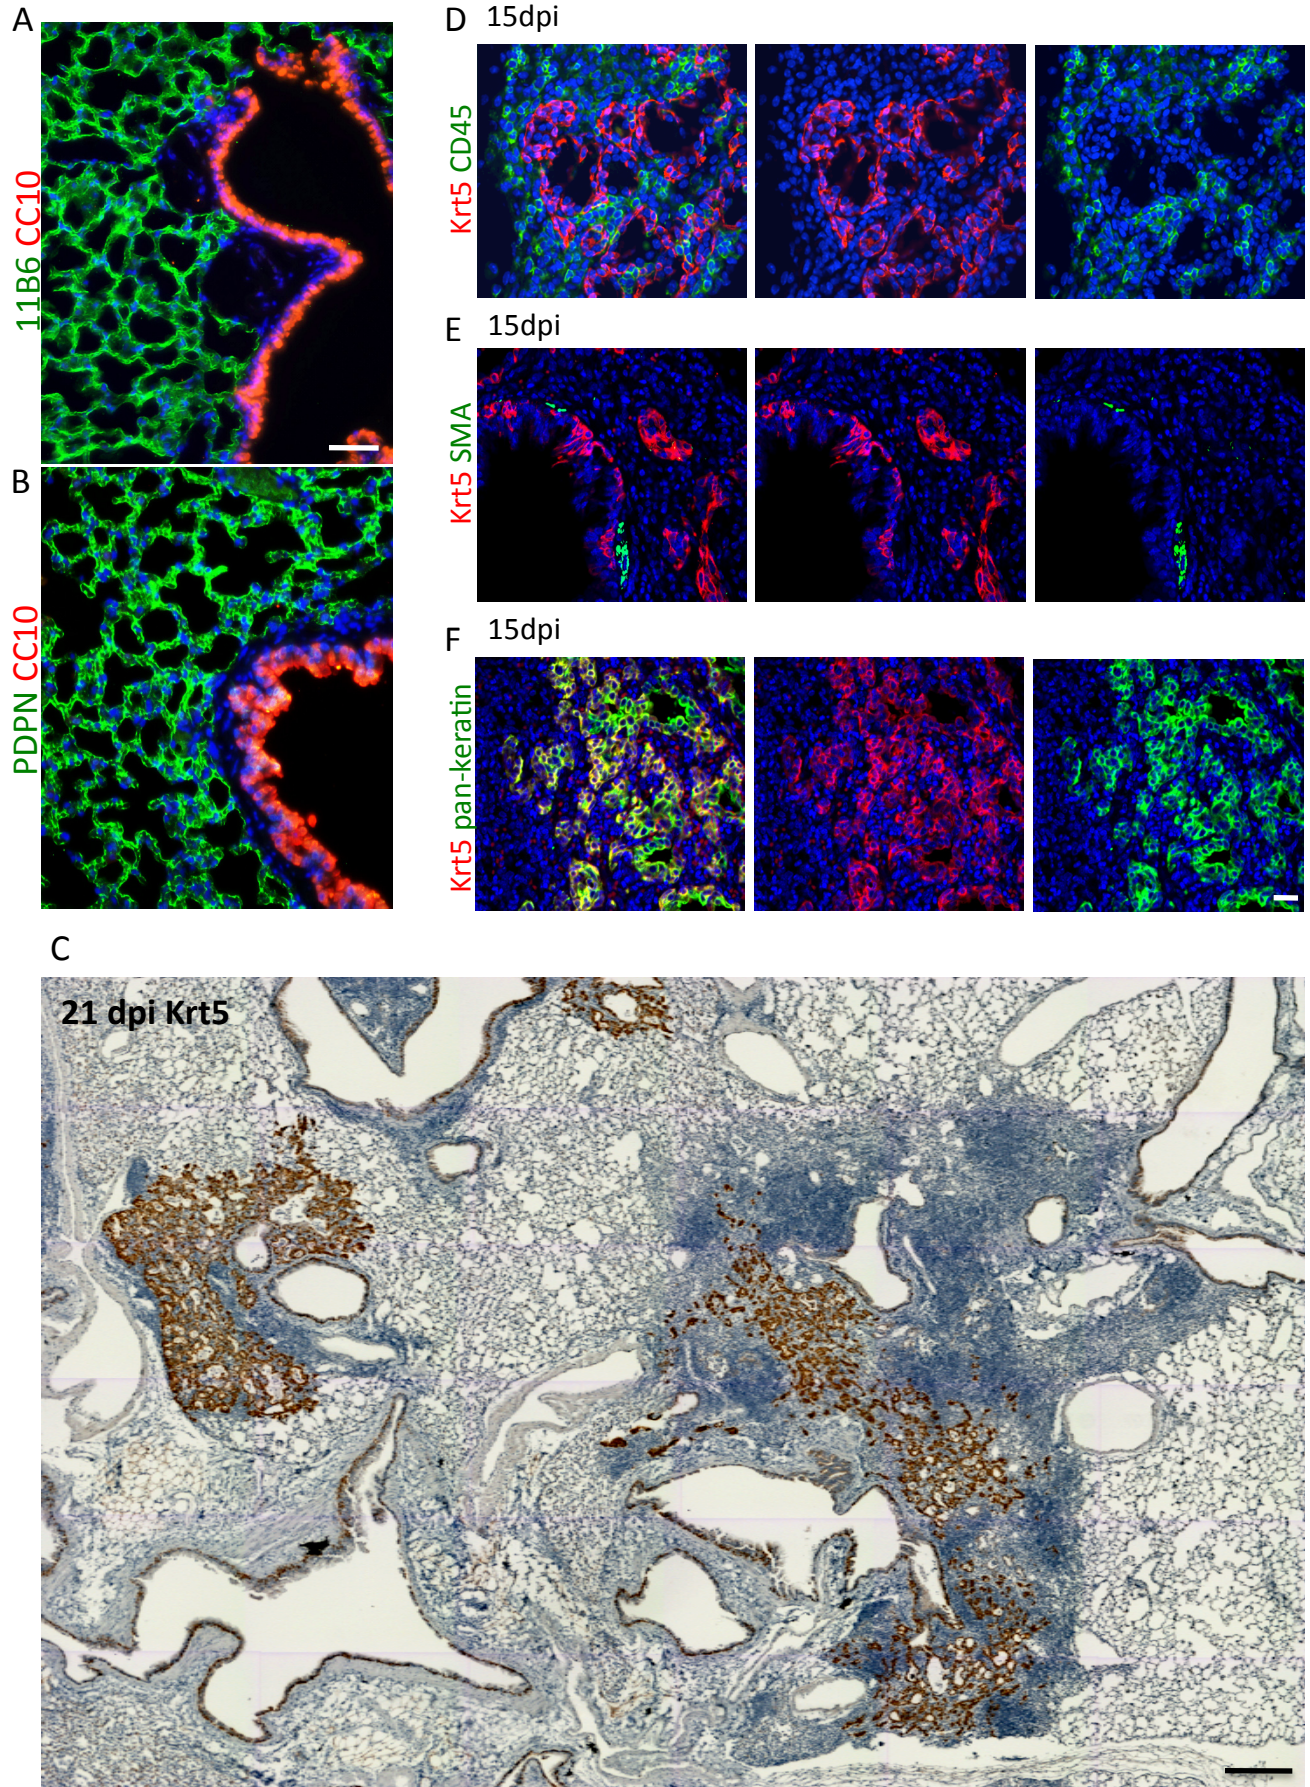

Figure S7. Related to Figure 7

A Normal lung SPC 11B6

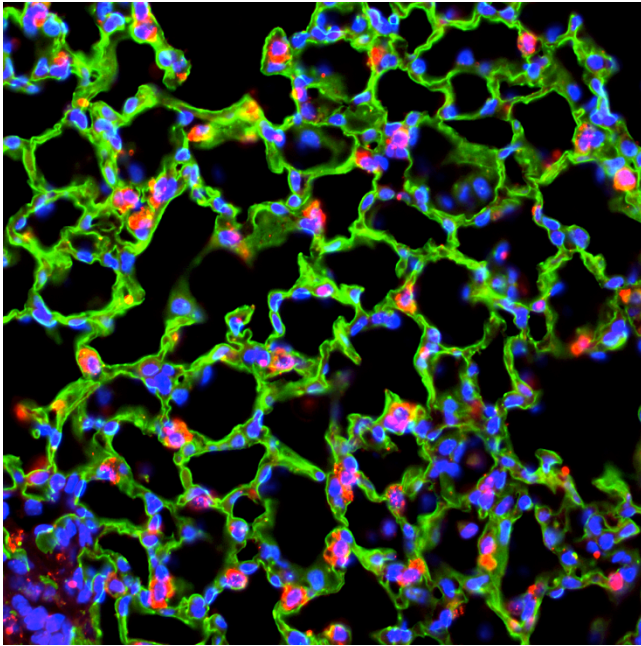

B SPC- Krt5+ Krt5 11B6

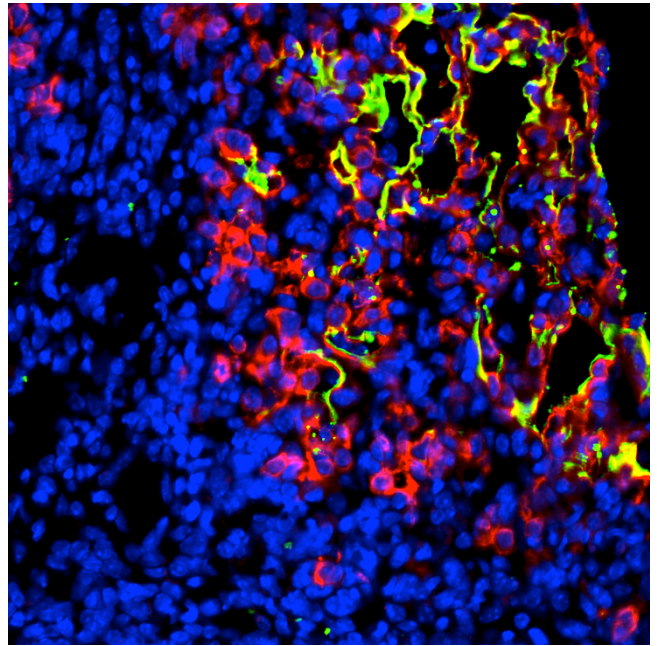

C SPC+ Krt5- SPC 11B6

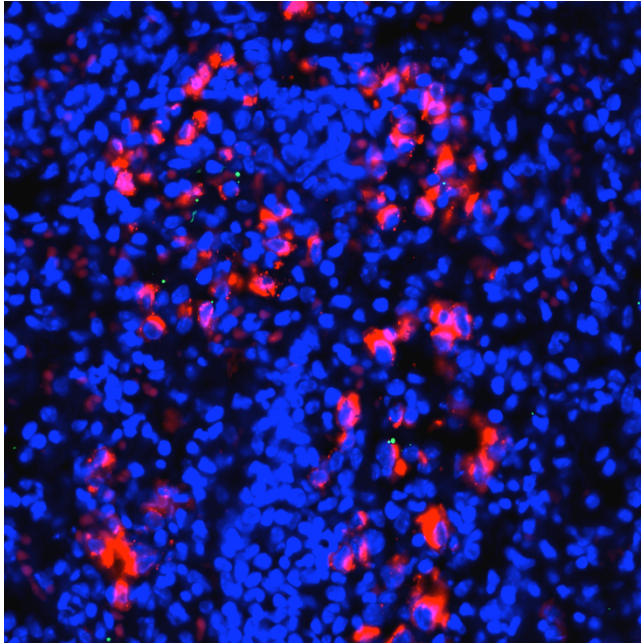

D SPC- Krt5- SPC 11B6

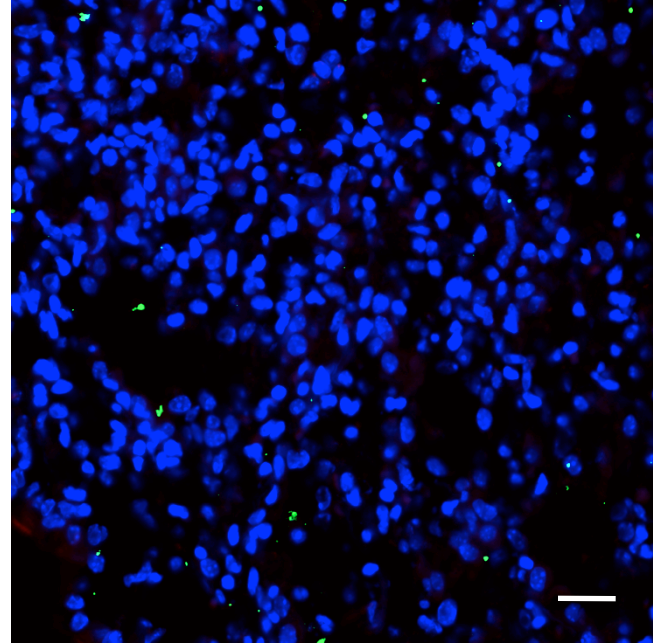

Figure S8. Related to Figure 8

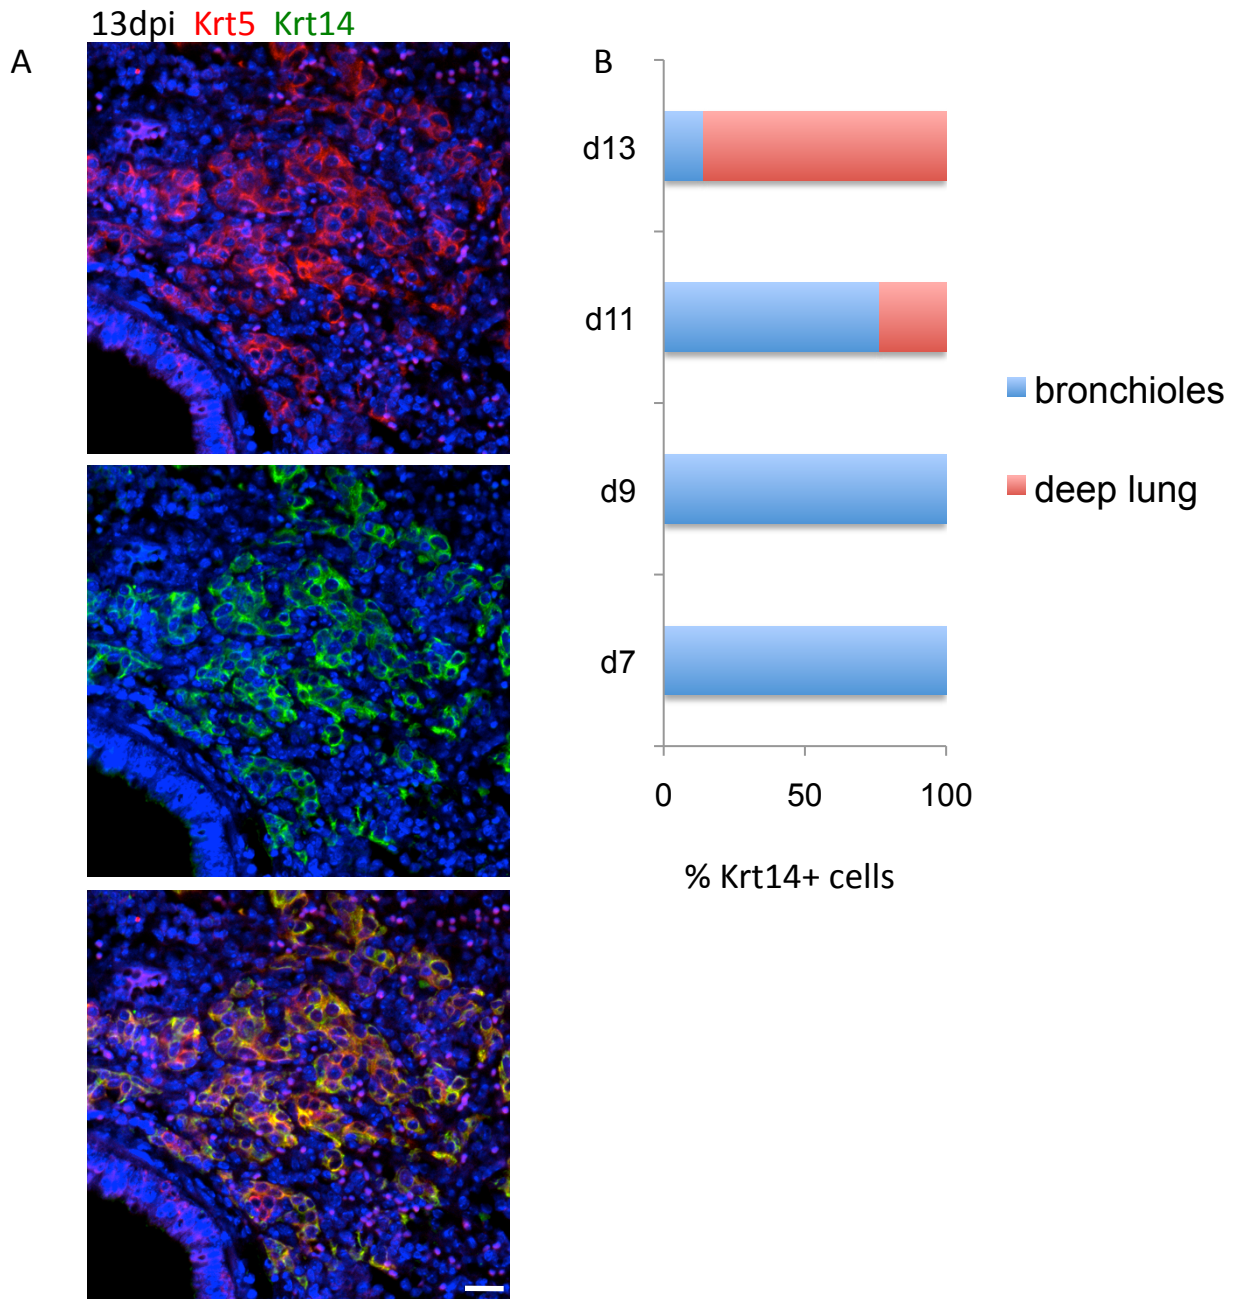

Supplement: NIHMS331003-supplement-01.pdf [file NIHMS331003-supplement-01.pdf]
