# Supplementary material
Source: PubMed Central journal article supplement (PMC4040224)
Supplement: NIHMS331003-supplement-02.pdf [file NIHMS331003-supplement-02.pdf]

Table S1. Related to Figure 3

| gene symbol | reference                 |
|-------------|---------------------------|
| MGP         | Gilbert and Rannels, 2004 |
| SPAC        | Strandjord et al., 1995   |
| ANGPT1      | Hato et al., 2009         |
| LIMCH1      | Costello et al., 2008     |
| CHI3L1      | Ober et al., 2008         |
| KDR         | Clerch et al., 2004       |
| PECAM       | DeLisser et al., 2006     |
| ANXA3       | Abdul-Salam et al.        |
| SLC39A8     | He et al., 2009           |
| ERRFI1      | Jin et al., 2009          |
| PDPN        | Rishi et al., 1995        |
| TSPAN8      | Cardoso and Lu, 2006      |

Abdul-Salam, V.B., Wharton, J., Cupitt, J., Berryman, M., Edwards, R.J., and Wilkins, M.R. Proteomic analysis of lung tissues from patients with pulmonary arterial hypertension. *Circulation* 122, 2058-2067.

Cardoso, W.V., and Lu, J. (2006). Regulation of early lung morphogenesis: questions, facts and controversies. *Development* 133, 1611-1624.

Clerch, L.B., Baras, A.S., Massaro, G.D., Hoffman, E.P., and Massaro, D. (2004). DNA microarray analysis of neonatal mouse lung connects regulation of KDR with dexamethasone-induced inhibition of alveolar formation. *Am J Physiol Lung Cell Mol Physiol* 286, L411-419.

Costello, C.M., Howell, K., Cahill, E., McBryan, J., Konigshoff, M., Eickelberg, O., Gaine, S., Martin, F., and McLoughlin, P. (2008). Lung-selective gene responses to alveolar hypoxia: potential role for the bone morphogenetic antagonist gremlin in pulmonary hypertension. *Am J Physiol Lung Cell Mol Physiol* 295, L272-284.

DeLisser, H.M., Helmke, B.P., Cao, G., Egan, P.M., Taichman, D., Fehrenbach, M., Zaman, A., Cui, Z., Mohan, G.S., Baldwin, H.S., *et al.* (2006). Loss of PECAM-1 function impairs alveolarization. *J Biol Chem* 281, 8724-8731.

Gilbert, K.A., and Rannels, S.R. (2004). Matrix GLA protein modulates branching morphogenesis in fetal rat lung. *American Journal of Physiology - Lung Cellular and Molecular Physiology* 286, L1179-L1187.

Hato, T., Kimura, Y., Morisada, T., Koh, G.Y., Miyata, K., Tabata, M., Kadomatsu, T., Endo, M., Urano, T., Arai, F., *et al.* (2009). Angiotensins contribute to lung development by regulating pulmonary vascular network formation. *Biochem Biophys Res Commun* 381, 218-223.

He, L., Wang, B., Hay, E.B., and Nebert, D.W. (2009). Discovery of ZIP transporters that participate in cadmium damage to testis and kidney. *Toxicol Appl Pharmacol* 238, 250-257.

Jin, N., Cho, S.N., Raso, M.G., Wistuba, I., Smith, Y., Yang, Y., Kurie, J.M., Yen, R., Evans, C.M., Ludwig, T., *et al.* (2009). Mig-6 is required for appropriate lung development and to ensure normal adult lung homeostasis. *Development* 136, 3347-3356.

Ober, C., Tan, Z., Sun, Y., Possick, J.D., Pan, L., Nicolae, R., Radford, S., Parry, R.R., Heinzmann, A., Deichmann, K.A., *et al.* (2008). Effect of variation in CHI3L1 on serum YKL-40 level, risk of asthma, and lung function. *N Engl J Med* 358, 1682-1691.

Rishi, A.K., Joyce-Brady, M., Fisher, J., Dobbs, L.G., Floros, J., VanderSpek, J., Brody, J.S., and Williams, M.C. (1995). Cloning, characterization, and development expression of a rat lung alveolar type I cell gene in embryonic endodermal and neural derivatives. *Dev Biol* 167, 294-306.

Strandjord, T.P., Sage, E.H., and Clark, J.G. (1995). Sparc participates in the branching morphogenesis of developing fetal-rat lung. *American Journal of Respiratory Cell and Molecular Biology* 13, 279-287.

Table S2. Related to Figure 7

## Pathways enriched in Cluster A (515 genes ) by GO with p&lt; 0.02

| Cluster A                                              |                |                   |         |
|--------------------------------------------------------|----------------|-------------------|---------|
| Pathways                                               | % of cluster A | % of whole genome | P value |
| Fructose galactose metabolism                          | 0.66           | 0.05              | 0.00203 |
| Glutamine glutamate conversion                         | 0.44           | 0.02              | 0.0036  |
| PI3 kinase pathway                                     | 1.31           | 0.42              | 0.0138  |
| Axon guidance mediated by netrin                       | 0.66           | 0.11              | 0.0149  |
| Insulin/IGF pathway-protein kinase B signaling cascade | 1.09           | 0.32              | 0.0162  |
| Flavin biosynthesis                                    | 0.22           | 0.00              | 0.0173  |

## Pathways enriched in Cluster B (281 genes ) by GO with p&lt; 0.02

| Cluster B                                                                         |                |                   |           |
|-----------------------------------------------------------------------------------|----------------|-------------------|-----------|
| Pathways                                                                          | % of cluster B | % of whole genome | P value   |
| 5-Hydroxytryptamine degradation                                                   | 1.91           | 0.09              | 0.0000429 |
| Phenylethylamine degradation                                                      | 1.53           | 0.05              | 0.000014  |
| Alzheimer disease-presenilin pathway                                              | 3.05           | 0.47              | 0.0000431 |
| Endothelin signaling pathway                                                      | 2.29           | 0.34              | 0.000312  |
| Angiogenesis                                                                      | 3.05           | 0.74              | 0.000827  |
| Cadherin signaling pathway                                                        | 2.67           | 0.64              | 0.00163   |
| Hedgehog signaling pathway                                                        | 1.15           | 0.10              | 0.00214   |
| Wnt signaling pathway                                                             | 3.44           | 1.33              | 0.00908   |
| GABA-B_receptor_II_signaling                                                      | 1.15           | 0.16              | 0.00957   |
| EGF receptor signaling pathway                                                    | 1.91           | 0.53              | 0.0132    |
| Beta2 adrenergic receptor signaling pathway                                       | 1.15           | 0.19              | 0.0136    |
| Beta1 adrenergic receptor signaling pathway                                       | 1.15           | 0.19              | 0.0136    |
| Heterotrimeric G-protein signaling pathway-Gq alpha and Go alpha mediated pathway | 1.91           | 0.53              | 0.0136    |
| TCA cycle                                                                         | 0.76           | 0.07              | 0.0144    |
| Nicotinic acetylcholine receptor signaling pathway                                | 1.53           | 0.37              | 0.0176    |
| Metabotropic glutamate receptor group II pathway                                  | 1.15           | 0.21              | 0.0184    |
| Succinate to propionate conversion                                                | 0.38           | 0.01              | 0.0198    |

## Pathways enriched in Cluster C (600 genes ) by GO with p&lt; 0.02

| Cluster C                                                         |                |                   |           |
|-------------------------------------------------------------------|----------------|-------------------|-----------|
| Pathways                                                          | % of cluster C | % of whole genome | P value   |
| Integrin signalling pathway                                       | 4.08           | 0.71              | 4.06E-11  |
| Angiogenesis                                                      | 3.72           | 0.74              | 2.92E-09  |
| Nicotinic acetylcholine receptor signaling pathway                | 2.13           | 0.37              | 0.0000217 |
| Alzheimer disease-presenilin pathway                              | 2.13           | 0.47              | 0.0000222 |
| Axon guidance mediated by semaphorins                             | 1.24           | 0.17              | 0.0000582 |
| VEGF signaling pathway                                            | 1.24           | 0.29              | 0.00149   |
| Inflammation mediated by chemokine and cytokine signaling pathway | 2.66           | 1.14              | 0.00247   |
| PDGF signaling pathway                                            | 1.60           | 0.62              | 0.00946   |
| Axon guidance mediated by Slit/Robo                               | 0.53           | 0.08              | 0.011     |
| B cell activation                                                 | 1.06           | 0.33              | 0.0123    |

## Pathways enriched in Cluster D (809 genes ) by GO with p&lt; 0.02

| Cluster D                                                                         |                |                   |           |
|-----------------------------------------------------------------------------------|----------------|-------------------|-----------|
| Pathways                                                                          | % of cluster D | % of whole genome | P value   |
| Inflammation mediated by chemokine and cytokine signaling pathway                 | 4.40           | 1.14              | 2.11E-10  |
| T cell activation                                                                 | 3.02           | 0.54              | 2.2E-10   |
| B cell activation                                                                 | 2.34           | 0.33              | 8.35E-10  |
| Toll receptor signaling pathway                                                   | 1.37           | 0.24              | 0.0000169 |
| DNA replication                                                                   | 0.69           | 0.10              | 0.000754  |
| PDGF signaling pathway                                                            | 1.79           | 0.62              | 0.000775  |
| Integrin signalling pathway                                                       | 1.79           | 0.71              | 0.00246   |
| JAK/STAT signaling pathway                                                        | 0.55           | 0.08              | 0.00255   |
| p53 pathway feedback loops 2                                                      | 0.82           | 0.19              | 0.00336   |
| EGF receptor signaling pathway                                                    | 1.37           | 0.53              | 0.00604   |
| Heterotrimeric G-protein signaling pathway-Gq alpha and Go alpha mediated pathway | 1.37           | 0.53              | 0.00633   |
| Apoptosis signaling pathway                                                       | 1.37           | 0.54              | 0.00696   |
| Axon guidance mediated by netrin                                                  | 0.55           | 0.11              | 0.00927   |
| FGF signaling pathway                                                             | 1.24           | 0.48              | 0.00929   |
| Interferon-gamma signaling pathway                                                | 0.55           | 0.11              | 0.0104    |
| Thyrotropin-releasing hormone receptor signaling pathway                          | 0.82           | 0.27              | 0.0155    |
